# Supplementary material for: Dysbiosis and genomic plasticity in the oily scalp microbiome: a multi-omics analysis of dandruff pathogenesis
Source: Front Microbiol. 2025 Jul 4;16:1595030. doi: 10.3389/fmicb.2025.1595030 (PMC12271121; doi:10.3389/fmicb.2025.1595030)
Supplement: Supplementary Table S1 — Integrated summary of microbial taxonomic profiles, alpha diversity indices, genus-level differential abundance (t-test statistics for DO-vs-HN and HO-vs-DO comparisons), demographic metadata, and functional annotations across HN, HO, and DO groups, including: bacterial/fungal phylum (top 10) and genus (top 30) composition from 16S/ITS amplicon sequencing; metagenomic species-level genus rankings (top 10); DIAMOND functional alignment results; and alpha diversity metrics for all samples. [file Table_1.xlsx]

## Sheet: metadata
Participant ID	Age	Gender	Location
A1	17-30	Female	Shantou
A2	17-30	Female	Shantou
A3	17-30	Female	Shantou
A4	17-30	Female	Shantou
A5	17-30	Female	Shantou
A6	17-30	Female	Shantou
A7	17-30	Female	Shantou
A8	17-30	Female	Shantou
A9	17-30	Female	Shantou
A10	17-30	Female	Shantou
A11	17-30	Female	Shantou
A12	17-30	Female	Shantou
A13	17-30	Female	Shantou
A14	17-30	Female	Shantou
A15	17-30	Female	Shantou
A16	17-30	Female	Shantou
B1	17-30	Male	Shantou
B2	17-30	Male	Shantou
B3	17-30	Male	Shantou
B4	17-30	Male	Shantou
B5	17-30	Male	Shantou
B6	17-30	Male	Shantou
B7	17-30	Male	Shantou
B8	17-30	Male	Shantou
B9	17-30	Male	Shantou
B10	17-30	Male	Shantou
B11	17-30	Male	Shantou
B12	17-30	Male	Shantou
B13	17-30	Male	Shantou
B14	17-30	Male	Shantou
B15	17-30	Male	Shantou
B16	17-30	Male	Shantou
C1	17-30	Female	Putian
C2	17-30	Female	Putian
C3	17-30	Female	Putian
C4	17-30	Female	Putian
C5	17-30	Female	Putian
C6	17-30	Female	Putian
C7	17-30	Female	Putian
C8	17-30	Female	Putian
C9	17-30	Female	Putian
C10	17-30	Female	Putian
C11	17-30	Female	Putian
C12	17-30	Female	Putian
C13	17-30	Female	Putian
C14	17-30	Female	Putian
C15	17-30	Female	Putian
C16	17-30	Female	Putian
C17	17-30	Female	Putian
D1	17-30	Male	Putian
D2	17-30	Male	Putian
D3	17-30	Male	Putian
D4	17-30	Male	Putian
D5	17-30	Male	Putian
D6	17-30	Male	Putian
D7	17-30	Male	Putian
D8	17-30	Male	Putian
D9	17-30	Male	Putian
D10	17-30	Male	Putian
D11	17-30	Male	Putian
D12	17-30	Male	Putian
D13	17-30	Male	Putian
D14	17-30	Male	Putian
D15	17-30	Male	Putian
D16	17-30	Male	Putian

## Sheet: DO-vs-HN.test
Taxa	avg(DO)	sd(DO)	avg(HN)	sd(HN)	p.value	q.values	interval lower	interval upper
k__Bacteria;p__Actinobacteriota;c__Actinobacteria;o__Propionibacteriales;f__Propionibacteriaceae;g__Cutibacterium;	0.278627	0.116482	0.649805	0.194737	0.00156434	0.00649666	-0.56279	-0.179566
k__Bacteria;p__Firmicutes;c__Bacilli;o__Staphylococcales;f__Staphylococcaceae;g__Staphylococcus;	0.587036	0.155061	0.193472	0.139384	0.000323109	0.00268373	0.221647	0.565481
k__Bacteria;p__Actinobacteriota;c__Actinobacteria;o__Corynebacteriales;f__Corynebacteriaceae;g__Lawsonella;	0.122669	0.179743	0.137005	0.118816	0.863647	0.2759	-0.194842	0.166171
k__Bacteria;p__Actinobacteriota;c__Actinobacteria;o__Corynebacteriales;f__Corynebacteriaceae;g__Corynebacterium;	0.00412687	0.00595905	0.00186026	0.0028742	0.389268	0.147095	-0.00342542	0.00795864
k__Bacteria;p__Proteobacteria;c__Alphaproteobacteria;o__Caulobacterales;f__Caulobacteraceae;g__Brevundimonas;	3.43026e-05	9.07562e-05	0.000290253	0.000504005	0.231427	0.130038	-0.000722676	0.000210776
k__Bacteria;p__Firmicutes;c__Bacilli;o__Lactobacillales;f__Lactobacillaceae;g__Lactobacillus;	0.000279698	0.000660001	0.000311362	0.000768286	0.935475	0.287778	-0.000867867	0.000804539
k__Bacteria;p__Actinobacteriota;c__Actinobacteria;o__Micrococcales;f__Micrococcaceae;g__Kocuria;	5.01346e-05	6.63524e-05	0.00171513	0.00306726	0.201016	0.128433	-0.00450176	0.00117177
k__Bacteria;p__Proteobacteria;c__Alphaproteobacteria;o__Rhodobacterales;f__Rhodobacteraceae;g__Paracoccus;	2.90253e-05	6.89931e-05	0.00164916	0.00271717	0.165795	0.128433	-0.00413312	0.000892846
k__Bacteria;p__Cyanobacteria;c__Cyanobacteriia;o__Chloroplast;f__unidentified_Chloroplast;g__unidentified_Chloroplast;	0.00013721	0.000254791	0.000836456	0.00206804	0.407826	0.147095	-0.00261265	0.00121416
k__Bacteria;p__Firmicutes;c__Bacilli;o__Lactobacillales;f__Streptococcaceae;g__Streptococcus;	0.000535648	0.000798236	0.00131141	0.00181386	0.329777	0.144164	-0.0024943	0.000942768
k__Bacteria;p__Deinococcota;c__Deinococci;o__Deinococcales;f__Deinococcaceae;g__Deinococcus;	3.43026e-05	7.57285e-05	0.000664943	0.00108375	0.175013	0.128433	-0.00163304	0.000371755
k__Bacteria;p__Actinobacteriota;c__Actinobacteria;o__Frankiales;f__Geodermatophilaceae;g__Geodermatophilus;	3.69413e-05	7.07371e-05	0.00074938	0.000965896	0.0990597	0.128433	-0.00160584	0.000180959
k__Bacteria;p__Actinobacteriota;c__Actinobacteria;o__Micrococcales;f__Micrococcaceae;g__Micrococcus;	2.63866e-05	4.9856e-05	0.000514539	0.000756652	0.138994	0.128433	-0.001188	0.000211691
k__Bacteria;p__Actinobacteriota;c__Actinobacteria;o__Pseudonocardiales;f__Pseudonocardiaceae;g__Pseudonocardia;	5.54119e-05	7.61564e-05	0.000340387	0.000750421	0.355352	0.147095	-0.000979166	0.000409215
k__Bacteria;p__Firmicutes;c__Negativicutes;o__Veillonellales-Selenomonadales;f__Veillonellaceae;g__Veillonella;	0.000116101	0.000252518	0.000474959	0.000786374	0.286955	0.132413	-0.0010924	0.000374684
k__Bacteria;p__Proteobacteria;c__Alphaproteobacteria;o__Sphingomonadales;f__Sphingomonadaceae;g__Sphingomonas;	9.23532e-05	0.000101728	0.000350942	0.000549792	0.264156	0.132413	-0.000767774	0.000250596
k__Bacteria;p__Proteobacteria;c__Alphaproteobacteria;o__Acetobacterales;f__Acetobacteraceae;g__Craurococcus-Caldovatus;	4.48572e-05	7.14228e-05	0.000390522	0.000502843	0.119926	0.128433	-0.000811006	0.000119676
k__Bacteria;p__Proteobacteria;c__Alphaproteobacteria;o__Acetobacterales;f__Acetobacteraceae;g__Roseomonas;	5.27732e-06	1.39625e-05	0.000277059	0.000465445	0.173399	0.128433	-0.000702253	0.000158689
k__Bacteria;p__Proteobacteria;c__Alphaproteobacteria;o__Tistrellales;f__Geminicoccaceae;g__Candidatus_Alysiosphaera;	0.000171513	0.000453781	2.3748e-05	6.28312e-05	0.42503	0.147095	-0.000272154	0.000567684
k__Bacteria;p__Actinobacteriota;c__Actinobacteria;o__Actinomycetales;f__Actinomycetaceae;g__Actinomyces;	7.38825e-05	8.26032e-05	0.000187345	0.000129921	0.0792855	0.128433	-0.000242826	1.59013e-05
k__Bacteria;p__Actinobacteriota;c__Actinobacteria;o__Corynebacteriales;f__Mycobacteriaceae;g__Mycobacterium;	0.000171513	0.000389743	3.69413e-05	9.77374e-05	0.406017	0.147095	-0.000227239	0.000496383
k__Bacteria;p__Actinobacteriota;c__Actinobacteria;o__Propionibacteriales;f__Nocardioidaceae;g__Nocardioides;	2.3748e-05	4.35978e-05	0.000187345	0.000365455	0.282949	0.132413	-0.000501713	0.000174519
k__Bacteria;p__Actinobacteriota;c__Actinobacteria;o__Kineosporiales;f__Kineosporiaceae;g__Quadrisphaera;	0	0	0.000240118	0.000343077	0.113514	0.128433	-0.000557411	7.71749e-05
k__Bacteria;p__Proteobacteria;c__Alphaproteobacteria;o__Rhizobiales;f__Beijerinckiaceae;g__Methylobacterium-Methylorubrum;	0.000102908	0.000234089	0.000160958	0.000305504	0.69733	0.231679	-0.000377397	0.000261296
k__Bacteria;p__Proteobacteria;c__Gammaproteobacteria;o__Pseudomonadales;f__Moraxellaceae;g__Enhydrobacter;	7.12439e-05	0.000111043	0.000211093	0.000238182	0.194686	0.128433	-0.000366615	8.69168e-05
k__Bacteria;p__Proteobacteria;c__Alphaproteobacteria;o__Rhodobacterales;f__Rhodobacteraceae;g__Rubellimicrobium;	5.80506e-05	0.000153587	0.000219009	0.000243744	0.169812	0.128433	-0.000403206	8.12896e-05
k__Bacteria;p__Actinobacteriota;c__Actinobacteria;o__Frankiales;f__Geodermatophilaceae;g__Blastococcus;	6.06892e-05	0.000101007	0.000192622	0.000251874	0.234841	0.130038	-0.00036908	0.000105213

## Sheet: HO-vs-DO.test
Taxa	avg(HO)	sd(HO)	avg(DO)	sd(DO)	p.value	q.values	interval lower	interval upper
k__Bacteria;p__Actinobacteriota;c__Actinobacteria;o__Propionibacteriales;f__Propionibacteriaceae;g__Cutibacterium;	0.632382	0.0752968	0.278637	0.116476	4.44048e-05	0.000510407	0.237355	0.470134
k__Bacteria;p__Firmicutes;c__Bacilli;o__Staphylococcales;f__Staphylococcaceae;g__Staphylococcus;	0.238424	0.0914282	0.587026	0.155075	0.00049031	0.00281791	-0.500797	-0.196406
k__Bacteria;p__Actinobacteriota;c__Actinobacteria;o__Corynebacteriales;f__Corynebacteriaceae;g__Lawsonella;	0.110961	0.132175	0.122658	0.179749	0.892183	0.512756	-0.197262	0.173868
k__Bacteria;p__Actinobacteriota;c__Actinobacteria;o__Corynebacteriales;f__Corynebacteriaceae;g__Corynebacterium;	0.00427727	0.00829989	0.00411367	0.00595904	0.966977	0.529278	-0.00834709	0.00867428
k__Bacteria;p__Proteobacteria;c__Alphaproteobacteria;o__Caulobacterales;f__Caulobacteraceae;g__Brevundimonas;	0.00151987	0.0040212	3.43026e-05	9.07562e-05	0.366181	0.338323	-0.00223345	0.00520458
k__Bacteria;p__Firmicutes;c__Bacilli;o__Lactobacillales;f__Listeriaceae;g__Listeria;	0.00135627	0.00358022	2.63866e-06	6.98124e-06	0.355774	0.338323	-0.00195752	0.00466479
k__Bacteria;p__Bacteroidota;c__Bacteroidia;o__Flavobacteriales;f__Weeksellaceae;g__Chryseobacterium;	0.00124017	0.00328118	3.95799e-05	7.49739e-05	0.370468	0.338323	-0.00183402	0.0042352
k__Bacteria;p__Firmicutes;c__Bacilli;o__Lactobacillales;f__Lactobacillaceae;g__Lactobacillus;	0.00122962	0.00325326	0.000269143	0.000663818	0.47094	0.338323	-0.00205405	0.003975
k__Bacteria;p__Cyanobacteria;c__Cyanobacteriia;o__Chloroplast;f__unidentified_Chloroplast;g__unidentified_Chloroplast;	0.000585783	0.0014134	0.000142488	0.000253641	0.443463	0.338323	-0.000865547	0.00175214
k__Bacteria;p__Firmicutes;c__Bacilli;o__Lactobacillales;f__Streptococcaceae;g__Streptococcus;	0.000343026	0.000493533	0.000540926	0.000787819	0.585593	0.354266	-0.000979954	0.000584155
k__Bacteria;p__Proteobacteria;c__Gammaproteobacteria;o__Pseudomonadales;f__Moraxellaceae;g__Acinetobacter;	0.000554119	0.00127305	0.000126656	0.000135491	0.410293	0.338323	-0.000750228	0.00160515
k__Bacteria;p__Deinococcota;c__Deinococci;o__Deinococcales;f__Deinococcaceae;g__Deinococcus;	0.00015832	0.000212976	3.43026e-05	7.57285e-05	0.187157	0.338323	-7.53383e-05	0.000323373
k__Bacteria;p__Actinobacteriota;c__Actinobacteria;o__Pseudonocardiales;f__Pseudonocardiaceae;g__Pseudonocardia;	0.000250673	0.00060059	5.27732e-05	7.34414e-05	0.419168	0.338323	-0.000357776	0.000753575
k__Bacteria;p__Proteobacteria;c__Gammaproteobacteria;o__Pseudomonadales;f__Pseudomonadaceae;g__Pseudomonas;	0.000319278	0.000726463	0.000139849	0.000171242	0.545961	0.348639	-0.000494501	0.000853359
k__Bacteria;p__Proteobacteria;c__Alphaproteobacteria;o__Acetobacterales;f__Acetobacteraceae;g__Craurococcus-Caldovatus;	0.000179429	0.000306433	4.48572e-05	7.14228e-05	0.296966	0.338323	-0.00014967	0.000418814
k__Bacteria;p__Proteobacteria;c__Alphaproteobacteria;o__Tistrellales;f__Geminicoccaceae;g__Candidatus_Alysiosphaera;	0	0	0.000174152	0.000460762	0.355918	0.338323	-0.000600285	0.000251982
k__Bacteria;p__Actinobacteriota;c__Actinobacteria;o__Corynebacteriales;f__Mycobacteriaceae;g__Mycobacterium;	7.91599e-06	2.09437e-05	0.000179429	0.000402941	0.303485	0.338323	-0.000544189	0.000201163
k__Bacteria;p__Actinobacteriota;c__Actinobacteria;o__Actinomycetales;f__Actinomycetaceae;g__Actinomyces;	0.000184706	0.000387003	8.17985e-05	8.52169e-05	0.515511	0.348559	-0.000255889	0.000461704
k__Bacteria;p__Cyanobacteria;c__Cyanobacteriia;o__Cyanobacteriales;f__Chroococcidiopsaceae;g__Chroococcidiopsis_PCC_7203;	0.00015832	0.000372304	1.5832e-05	4.18875e-05	0.352229	0.338323	-0.000201945	0.000486921
k__Bacteria;p__Proteobacteria;c__Gammaproteobacteria;o__Burkholderiales;f__Oxalobacteraceae;g__Massilia;	0.000187345	0.00027858	1.5832e-05	2.90652e-05	0.155282	0.338323	-8.6197e-05	0.000429223
k__Bacteria;p__Proteobacteria;c__Gammaproteobacteria;o__Pseudomonadales;f__Moraxellaceae;g__Enhydrobacter;	0.000182068	0.000243511	7.12439e-05	0.000119907	0.308914	0.338323	-0.000122277	0.000343925

## Sheet: Metagenomic.g10.tran
genus	g__Cutibacterium	g__Staphylococcus	g__Malassezia	g__Escherichia	g__Pseudomonas	g__Lawsonella	g__Burkholderia	g__Shigella	g__Mycobacterium	g__Legionella	Others
HN	0.120925	0.0245638	0.0478975	0.0169191	0.0169434	0.0187674	0.00583301	0.00554737	0.00522417	0.00511209	0.732267
HO	0.0922889	0.0292163	0.0790094	0.0179721	0.0177956	0.0146604	0.00603452	0.00549973	0.00526214	0.00625664	0.726004
DO	0.0254142	0.0820918	0.0621932	0.0272495	0.0261303	0.0220593	0.00978048	0.00863445	0.0086227	0.00861803	0.719206

## Sheet: top10.sample.p
Taxonomy	Actinobacteriota	Firmicutes	Deinococcota	Proteobacteria	Cyanobacteria	Bacteroidota	Fusobacteriota	Patescibacteria	Acidobacteriota	Euryarchaeota	Others
A1	0.808435	0.190851	0	0.000559511	3.85869e-05	0	0	0	3.85869e-05	0	7.71739e-05
A2	0.667072	0.324632	0.00293261	0.00395516	0.000540217	0.000173641	0	0	5.78804e-05	0	0.000636685
A3	0.718663	0.277884	9.64674e-05	0.00156277	0.00123478	9.64674e-05	0.000135054	0	0	0	0.000327989
A4	0.767012	0.231888	0	0.000636685	0	0	7.71739e-05	0	0	0	0.000385869
A5	0.718257	0.215064	7.71739e-05	0.0493141	0.000482337	0.0122128	0.00144701	0.000289402	0	0	0.00285543
A6	0.789026	0.201424	0.000868206	0.00684918	0.000366576	0.000520924	0	0	0.000115761	0	0.000829619
A7	0.909051	0.0906407	0	0.000154348	0	0	3.85869e-05	0	0	0	0.000115761
A8	0.749764	0.249966	0	7.71739e-05	1.92935e-05	5.78804e-05	0	0	3.85869e-05	0	7.71739e-05
A9	0.793618	0.205379	9.64674e-05	0.000578804	0	5.78804e-05	0	0	0	0	0.000270109
A10	0.950377	0.0470568	0	0.000906793	0	0.00135054	9.64674e-05	0.000154348	0	0	5.78804e-05
A11	0.910015	0.0878818	0.000173641	0.000366576	0.00150489	0	0	0	0	0	5.78804e-05
A12	0.977716	0.017885	9.64674e-05	0.00349212	9.64674e-05	0	0	0	0	0	0.000713859
A13	0.903764	0.0943065	0	0.00102255	0.000366576	0.000231522	1.92935e-05	0	7.71739e-05	0	0.000212228
A14	0.890317	0.104667	0	0.00279755	0.000173641	7.71739e-05	0.000154348	0	7.71739e-05	0	0.00173641
A15	0.475179	0.522815	5.78804e-05	0.000598098	7.71739e-05	0.000405163	0	0	0	0	0.000868206
A16	0.573537	0.423858	0	0.000540217	1.92935e-05	7.71739e-05	0	1.92935e-05	3.85869e-05	0	0.00191005
B1	0.483919	0.514788	0	0.00109973	0	1.92935e-05	0	0	0	0	0.000173641
B2	0.669792	0.32934	0	0.000559511	0	1.92935e-05	0	0	0	0	0.000289402
B3	0.863402	0.0804924	0.000347283	0.0366962	5.78804e-05	0.00449538	0.000173641	0.00140842	0.00044375	0	0.0124829
B4	0.916614	0.0820551	3.85869e-05	0.0008875	7.71739e-05	7.71739e-05	0	0	0	0	0.000250815
B5	0.760317	0.235689	3.85869e-05	0.00252744	0.000810326	0	0	0	0.000212228	0	0.000405163
B6	0.688526	0.30667	0.000424456	0.00285543	0.000347283	0.000289402	1.92935e-05	0	9.64674e-05	0	0.000771739
B7	0.920434	0.077444	1.92935e-05	0.00185217	5.78804e-05	0	0	0	3.85869e-05	0	0.000154348
B8	0.651425	0.332851	0	0.0134283	3.85869e-05	0.000559511	5.78804e-05	9.64674e-05	0	0	0.00154348
B9	0.576952	0.154039	0.12533	0.0879975	0.000289402	0.0331076	1.92935e-05	0.00111902	1.92935e-05	0.00353071	0.0175956
B10	0.818583	0.174837	0.000135054	0.00239239	0.000231522	0.000250815	0	0	0	0	0.00356929
B11	0.83396	0.0783315	0	0.00559511	7.71739e-05	0.0287666	0.0264899	0.0223611	0	0	0.00441821
B12	0.721807	0.273003	0.000115761	0.000791032	0.00111902	9.64674e-05	0	3.85869e-05	0	0	0.00302908
B13	0.538616	0.457718	0	0.000694565	0.000848913	0.000366576	1.92935e-05	0	0	0	0.00173641
B14	0.793425	0.16083	9.64674e-05	0.0242905	0.00574945	0.00546005	0.00540217	0.000559511	5.78804e-05	0	0.0041288
B15	0.442033	0.555845	0	0.000482337	0.000308696	7.71739e-05	0	0	0	0	0.00125408
B16	0.587332	0.385696	0.000250815	0.0173641	0.00567228	0.000559511	0	0	0	0	0.00312554
C1	0.772221	0.225541	0	0.000212228	7.71739e-05	0	0	0	0	0	0.00194864
C2	0.871042	0.127858	0	0.000308696	5.78804e-05	0	0	0	0	0	0.000733152
C3	0.773707	0.225328	1.92935e-05	0.000327989	0	3.85869e-05	5.78804e-05	0	0	0	0.000520924
C4	0.655013	0.327777	0.000752445	0.00870136	0.00605815	7.71739e-05	0	0	0.000115761	0	0.00150489
C5	0.692134	0.303255	0.00162065	0.00108043	5.78804e-05	9.64674e-05	0	9.64674e-05	1.92935e-05	0	0.00163995
C6	0.446875	0.544018	9.64674e-05	0.00792962	0.000424456	0.000135054	0	1.92935e-05	7.71739e-05	0	0.000424456
C7	0.69497	0.299608	0.000540217	0.00225734	0.000347283	0.000578804	0	0	0	0	0.00169783
C8	0.518146	0.470896	0.000289402	0.00289402	0.000250815	0.000231522	0	0	0	0	0.00729293
C9	0.645289	0.354421	0	0.000192935	1.92935e-05	0	0	0	0	0	7.71739e-05
C10	0.931257	0.0630511	0	0.000752445	5.78804e-05	0.000212228	0	0	0	0	0.00466902
C11	0.838359	0.159383	5.78804e-05	0.00106114	7.71739e-05	0.000173641	0	0	0	0	0.0008875
C12	0.800235	0.196967	0.000250815	5.78804e-05	0.000135054	5.78804e-05	0	0	0	0	0.00229592
C13	0.857518	0.138585	9.64674e-05	0.00216087	0.000154348	0.000115761	0	1.92935e-05	0	0	0.00135054
C14	0.352723	0.640813	0.000154348	0.00212228	0.00100326	0.000617391	9.64674e-05	0	9.64674e-05	0	0.0023731
C15	0.73321	0.262874	1.92935e-05	0.000848913	3.85869e-05	0.000308696	0.000463043	3.85869e-05	1.92935e-05	0	0.00218016
C16	0.860547	0.136308	0.000482337	0.00138913	5.78804e-05	3.85869e-05	0	0	3.85869e-05	0	0.00113831
C17	0.263973	0.732052	0.000192935	0.000964674	0	0.000289402	3.85869e-05	0	0	0	0.00248886
D1	0.838244	0.142289	0.00136984	0.00891358	0.0076788	0.000347283	0	0	9.64674e-05	0	0.00106114
D2	0.71272	0.240725	0.000212228	0.0108043	0.00229592	0.0169783	0.00800679	5.78804e-05	1.92935e-05	0	0.00818043
D3	0.633077	0.359553	0.000617391	0.00316413	0.00223804	0	0	0	5.78804e-05	0	0.00129266
D4	0.699157	0.299165	0.000598098	0.000752445	0	0	0	0	0	0	0.000327989
D5	0.620401	0.376937	1.92935e-05	0.000115761	0.000540217	5.78804e-05	0	0	0	0	0.00192935
D6	0.377728	0.568926	0.000520924	0.0346511	0.00219946	0.0134668	0.000694565	0.000520924	3.85869e-05	0	0.00125408
D7	0.592734	0.405896	0	0.00100326	0	0	0	0	0	0	0.000366576
D8	0.729795	0.241091	3.85869e-05	0.0183095	0.00050163	0.00908723	0	0	1.92935e-05	0	0.00115761
D9	0.7373	0.132334	0.00142772	0.0477706	0.0639579	0.00154348	0	0	0.0041288	0	0.0115375
D10	0.789007	0.202717	0.000270109	0.00277826	0.00343424	0.000752445	0.000154348	0	0	0	0.0008875
D11	0.629913	0.355038	0.000347283	0.00594239	0.00652119	0.000675272	0.000115761	0	0.000347283	0	0.00109973
D12	0.660589	0.330015	0.000366576	0.00499701	0.00327989	0.000327989	5.78804e-05	0	0	0	0.000366576
D13	0.133665	0.860875	9.64674e-05	0.00194864	0.000424456	0.000212228	0	0	0	0	0.00277826
D14	0.691208	0.28591	0.000173641	0.0155698	0.000713859	0.00576875	0	1.92935e-05	0	0	0.000636685
D15	0.666647	0.329668	0	0.00140842	5.78804e-05	0	0	0	0	0	0.00221875
D16	0.189906	0.802435	0	0.00542147	9.64674e-05	0.000327989	0	0	0.000115761	0	0.00169783

## Sheet: top30.sample.g
Taxonomy	Cutibacterium	Staphylococcus	Lawsonella	Deinococcus	Corynebacterium	Enhydrobacter	Actinomyces	Lactobacillus	Leptotrichia	Chryseobacterium	Streptococcus	Anaerococcus	Neisseria	unidentified_Saccharimonadales	Lautropia	Prevotella	Brevundimonas	Listeria	Kocuria	Capnocytophaga	Olsenella	Prevotella_7	Peptoniphilus	Acinetobacter	Paracoccus	Chroococcidiopsis_SAG_2023	Micrococcus	Actinomycetospora	Auricoccus-Abyssicoccus	Gardnerella	Others
A1	0.405857	0.190021	0.402057	0	0.000347283	0	0	1.92935e-05	0	0	0.00044375	0	0	0	0	0	0	0	0.000173641	0	0	0	0	0	0.000424456	0	0	0	0	0	0.000655978
A2	0.51091	0.32114	0.15157	0.00289402	0.000578804	0	0.000173641	0.00204511	0	0	0.000250815	0.000250815	0	0	0	3.85869e-05	0	0	0.00044375	0	0	0	0.000173641	0	0.00050163	0	0	0	0	0	0.00902935
A3	0.296618	0.277324	0.418302	9.64674e-05	0.00287473	1.92935e-05	0.000559511	0	5.78804e-05	0	0.000154348	0.000115761	0	0	0	0	0	0	3.85869e-05	1.92935e-05	0	0	0	0	0	3.85869e-05	7.71739e-05	0	0	0	0.00370435
A4	0.717987	0.231869	0.048716	0	0.000270109	0	0	0	0	0	0	0	7.71739e-05	0	0	0	0	0	0	0	0	0	0	0	0	0	0	0	0	0	0.00108043
A5	0.613455	0.20453	0.078563	7.71739e-05	0.021956	7.71739e-05	0.00250815	0.000810326	0.000598098	3.85869e-05	0.00536359	0.000115761	0.0186568	7.71739e-05	0.0136791	0.00108043	0	0	0	0.00829619	1.92935e-05	0.000675272	0.000115761	9.64674e-05	0	0	0	0	0	0.000520924	0.0286894
A6	0.658313	0.199359	0.123382	0.000868206	0.00191005	0.000135054	0	0	0	0.000154348	0.000366576	0	7.71739e-05	0	3.85869e-05	0	0	0	0.000655978	0	0	0.000115761	3.85869e-05	0.00125408	0.000926087	0	0.000192935	0.000231522	0	0	0.0119812
A7	0.834211	0.0904671	0.0744728	0	0.000135054	1.92935e-05	0	0.000115761	3.85869e-05	0	3.85869e-05	0	0	0	0	0	0	0	0.000192935	0	0	0	0	5.78804e-05	0	0	3.85869e-05	0	0	0	0.000212228
A8	0.386217	0.249735	0.363354	0	5.78804e-05	5.78804e-05	0	0	0	0	0.000192935	0	0	0	0	0	0	0	9.64674e-05	0	0	0	0	0	0	0	0	0	0	0	0.000289402
A9	0.576065	0.204993	0.215855	9.64674e-05	0.000791032	0	0	0	0	0	0	0.000192935	0	0	0	5.78804e-05	0	0	0.000115761	0	0	0	0	0	0	0	0	0	0	0	0.00183288
A10	0.947541	0.0394937	1.92935e-05	0	0.00115761	0.000135054	0.000135054	0	0	0	0.00418668	1.92935e-05	3.85869e-05	3.85869e-05	0	0.000250815	0	0	0.000385869	0	0.000115761	0.000250815	3.85869e-05	0	0.000289402	0	0.000463043	0	0	0	0.00544076
A11	0.86537	0.0878818	0.0425614	9.64674e-05	0.000212228	0	0	0	0	0	0	0	0	0	0	0	0	0	0	0	0	0	0	0	0	0.000212228	0	0	0	0	0.00366576
A12	0.615307	0.0175764	0.361849	0	0.000192935	0	0	0.000192935	0	0	9.64674e-05	0	0	0	0	0	0	0	0	0	0	0	0	0	0	0	0	0	0	3.85869e-05	0.00474619
A13	0.845247	0.092956	0.000424456	0	0.0578225	0	9.64674e-05	0.000347283	0	0	0.000482337	9.64674e-05	0.000115761	0	0	0.000154348	0	0	0	0	0	7.71739e-05	0	3.85869e-05	5.78804e-05	0	0	0	0	3.85869e-05	0.00204511
A14	0.318323	0.104165	0.57128	0	0.000212228	0.000366576	1.92935e-05	0	0	7.71739e-05	0.000289402	0	3.85869e-05	0	0	0	0	0	0	0	0	0	0	3.85869e-05	0	0	0.000192935	0	0	0.000115761	0.00488125
A15	0.237001	0.521811	0.23758	5.78804e-05	0.000308696	0.000135054	7.71739e-05	0	0	0	0.000482337	9.64674e-05	0	0	0	0.000212228	0	0	3.85869e-05	0	0	0	1.92935e-05	0	0	0	0	0	0	0	0.00218016
A16	0.465706	0.423723	0.107445	0	0.000115761	7.71739e-05	3.85869e-05	0	0	0	3.85869e-05	0	3.85869e-05	0	3.85869e-05	3.85869e-05	0	0	0	0	0	0	0	0	0	1.92935e-05	0	0	0	0	0.00272038
B1	0.314001	0.514557	0.152013	0	0.0172677	0.000289402	9.64674e-05	0	0	1.92935e-05	9.64674e-05	3.85869e-05	0	0	0	0	0	1.92935e-05	7.71739e-05	0	0	0	0	0	1.92935e-05	0	7.71739e-05	0	0	0	0.00142772
B2	0.362158	0.329069	0.305435	0	0.001775	0	0	0	0	1.92935e-05	7.71739e-05	0.000135054	0	0	0	0	0	0	0.000135054	0	0	0	0	0	0.000154348	0	7.71739e-05	0	0	0	0.000964674
B3	0.855048	0.0780228	0.000212228	7.71739e-05	0.00445679	0.0227084	0.000192935	1.92935e-05	0	0.00239239	0	0.000135054	0	0	0	0	9.64674e-05	1.92935e-05	0	0	0	0	0	0.000154348	0.00140842	0	0.000810326	0	0	0	0.0342459
B4	0.790261	0.0817657	0.12425	1.92935e-05	0.00131196	0	0	0	0	0	9.64674e-05	0	0	0	0	3.85869e-05	0	0	0.000636685	0	0	0	0	0	0	0	0	0	0	0	0.00162065
B5	0.448226	0.23538	0.305146	3.85869e-05	0.00524782	0.000327989	0	0	0	0	0	0	5.78804e-05	0	0	0	0	0	0.000270109	0	0	0	0	0	0	0.000115761	0.00094538	0	0.000154348	0	0.00409022
B6	0.478401	0.305609	0.205186	0.000231522	0.000366576	0.000636685	0.000385869	0	1.92935e-05	0.000212228	0.000926087	0	0	0	0	0	0.000231522	0	0.000463043	1.92935e-05	0	0	0	9.64674e-05	0.000192935	1.92935e-05	0.000463043	0	0	0	0.00654049
B7	0.765604	0.0773861	0.15348	1.92935e-05	0.000347283	0.000231522	0.000115761	0	0	0	0	5.78804e-05	0	0	0	0	0	0	0	0	0	0	0	3.85869e-05	7.71739e-05	0	0.000115761	0	0	0	0.00252744
B8	0.225	0.325095	0.42272	0	0.00239239	0.00713859	0.000385869	0	0	3.85869e-05	0.00520924	3.85869e-05	0.0011769	0	0	5.78804e-05	3.85869e-05	0	0	0	0	3.85869e-05	0.000173641	3.85869e-05	0	0	7.71739e-05	0	0	0	0.0103799
B9	0.524609	0.150161	0.0498929	0.12533	0.00106114	0.0791611	0	0.000212228	1.92935e-05	0.0218788	9.64674e-05	5.78804e-05	5.78804e-05	0	0	1.92935e-05	0	1.92935e-05	9.64674e-05	0	3.85869e-05	0.000115761	0	1.92935e-05	0.000482337	5.78804e-05	5.78804e-05	0	0	0	0.0465552
B10	0.241419	0.174741	0.575177	0.000135054	0.00109973	0.000655978	0	0	0	0.000192935	9.64674e-05	0	0	0	0	0	0	0	0.000289402	0	0	0	0	9.64674e-05	0.000270109	0	5.78804e-05	0	0	0	0.00576875
B11	0.750439	0.0584978	0.0135826	0	0.017885	0	0.0401883	0	0.0244448	0	0.00258533	0	0.000675272	0.0173641	0.000308696	0.0132546	0	0	9.64674e-05	0.000791032	0.00823831	0.00785244	0	0	0	0	7.71739e-05	0	0	0	0.043719
B12	0.614709	0.272366	0.0492755	0.000115761	0.0576489	9.64674e-05	0	0	0	0	0.000231522	0.000115761	0.000308696	3.85869e-05	7.71739e-05	0	0	0	5.78804e-05	0	0	0	0	0	0	0	0.000115761	0	0	0	0.00484266
B13	0.464452	0.454786	0.0406899	0	0.0323744	1.92935e-05	0.000192935	0	0	0	0.000270109	0.000675272	0.000270109	0	0	0.000366576	0	0.000115761	9.64674e-05	0	0	0	0.000250815	0.000135054	0	0	0	0	0	0	0.00530571
B14	0.72966	0.145068	0.00123478	9.64674e-05	0.0480022	0.000270109	0.00609674	0	0.00389728	7.71739e-05	0.00466902	0.00374293	0.00262391	7.71739e-05	0.000250815	0.000771739	0.000192935	9.64674e-05	0.00115761	0.00225734	0	0.000829619	0.000559511	0.00744728	5.78804e-05	0	0.00364647	0	0.000154348	7.71739e-05	0.0369856
B15	0.412051	0.555035	0.0258918	0	0.00351141	0	0	0	0	0	1.92935e-05	0.000154348	0	0	0	0	0	0	0	0	0	0	0	0	0.000212228	0	0	0	0	0	0.00312554
B16	0.533696	0.384635	0.0260848	0.000250815	0.00819973	0.000424456	0.000231522	0	0	0.000135054	0.000135054	5.78804e-05	0	0	0	0	0.00044375	0	0.00850842	0	0	0	0.000154348	0.000289402	0.00725435	0.000154348	0.00216087	0.000617391	0	0	0.0265671
C1	0.736837	0.225328	0.0351334	0	5.78804e-05	5.78804e-05	0	7.71739e-05	0	0	0.000115761	0	0	0	0	0	0	0	0	0	0	0	0	0	0	0	0	0	0	0	0.00239239
C2	0.58274	0.127549	0.287299	0	0.000771739	0	0	0	0	0	0.000192935	0	0	0	0	0	0	0	0	0	0	0	0	0	0	5.78804e-05	0	0	0	0	0.00138913
C3	0.727248	0.22446	0.04615	1.92935e-05	0.000192935	0	0	0	5.78804e-05	0	0.000752445	0	3.85869e-05	0	3.85869e-05	0	0	0	7.71739e-05	0	0	0	0	0	0	0	0	0	0	0	0.000964674
C4	0.438695	0.327159	0.215142	0.000424456	0.000270109	0.000308696	0	0	0	0	0.000270109	0	3.85869e-05	0	0	0	0	0	0.000173641	0	0	0	0	0	0.000308696	0.0026625	0	0	0	0	0.0145473
C5	0.689857	0.302946	5.78804e-05	0	0.0011769	0	0	0	0	0	5.78804e-05	3.85869e-05	0	0	0	0	0	0	0.000173641	3.85869e-05	0	0	1.92935e-05	1.92935e-05	0	0	0	0	0	0	0.0056144
C6	0.397079	0.540044	0.0452625	3.85869e-05	0.00189076	0	0.000250815	0.001775	0	0	0.00129266	1.92935e-05	7.71739e-05	0	3.85869e-05	0	0	0	0.000154348	0	0	0	5.78804e-05	9.64674e-05	0	3.85869e-05	0.000135054	0.000270109	0	0	0.0114796
C7	0.692462	0.290097	0.000366576	0.000135054	0.00138913	0.000154348	0	0.00866277	0	0	0	0	0	0	0	0	0	0	3.85869e-05	0	0	0	0	0	0	0	0	0	0	0.000154348	0.00654049
C8	0.504351	0.47078	0.0113253	0	0.00044375	0	0	0	0	0	0	0	0	0	0	0	0	0	0	0	0	0	0	0	7.71739e-05	9.64674e-05	0	0	0	0	0.0129266
C9	0.409928	0.35417	0.235072	0	0.000154348	0	0	0	0	0	0	0	3.85869e-05	0	0	0	0	0	0	0	0	0	0	3.85869e-05	0	0	0	0	0	0	0.000598098
C10	0.574618	0.0624916	0.355733	0	0.000308696	3.85869e-05	0.000135054	0	0	0	0.000308696	0	0	0	0	0	0	1.92935e-05	0.000270109	0	0	0.000173641	0	1.92935e-05	3.85869e-05	0	0	0	0	0	0.00584592
C11	0.770253	0.155139	0.0507032	5.78804e-05	0.016438	0.000231522	0.000173641	0.00248886	0	0	0.000655978	1.92935e-05	3.85869e-05	0	0	0	0	0	9.64674e-05	0	0	0	0	0	0	0	0.000231522	0	0	0.000212228	0.0032606
C12	0.400918	0.196736	0.398314	0.000250815	0.000791032	0	3.85869e-05	0	0	0	3.85869e-05	0.000135054	0	0	0	0	0	0	1.92935e-05	0	0	0	0	0	0	0	0	0	0	0	0.00275897
C13	0.850244	0.137948	0.00598098	9.64674e-05	0.000675272	0.00100326	1.92935e-05	0	0	0	0.00050163	0	0	0	0	0	0	1.92935e-05	7.71739e-05	0	0	0	0	0.000405163	3.85869e-05	1.92935e-05	3.85869e-05	0	0	0	0.00293261
C14	0.310008	0.6368	0.0406899	0	0.00106114	5.78804e-05	0.000115761	0	9.64674e-05	0.000192935	0.00198723	0	0.000327989	0	1.92935e-05	1.92935e-05	0	0	0	3.85869e-05	0	3.85869e-05	0	0.000192935	0	7.71739e-05	0	0	0	0	0.0082769
C15	0.683529	0.26214	0.0477321	1.92935e-05	0.000482337	0	0.000983967	0	0	0	0.000385869	0	1.92935e-05	0	0.000192935	0.000192935	0	7.71739e-05	3.85869e-05	1.92935e-05	0	1.92935e-05	0	3.85869e-05	0	0	0	0	0	0	0.0041288
C16	0.839401	0.136212	0.0201424	0.000463043	0.000115761	0	0	0	0	0	0	0	0	0	0	0	1.92935e-05	0	0.000154348	0	0	0	0	0.000231522	3.85869e-05	0	0	0	0	0	0.00322201
C17	0.263337	0.731049	7.71739e-05	0.000192935	0.000231522	0	0.000115761	5.78804e-05	3.85869e-05	0	0.000192935	0	0.000154348	0	0	0	0	0	0	0	0	0	0	0.000173641	0	0	0	0	0	0	0.00437962
D1	0.478304	0.135556	0.34817	0.00129266	0.00227663	9.64674e-05	0.000270109	0	0	0	0.00356929	0	0	0	0	0	0.00135054	0	0.00196793	0	0	0.000250815	0	5.78804e-05	0.0032606	0.000231522	0.000327989	0	0	0	0.0230171
D2	0.538056	0.176921	0.13517	0.000212228	0.0250043	0.00115761	0.00522853	0.025178	0.00387799	0.000636685	0.0198916	0.00154348	0.00131196	0	0	0.00551793	7.71739e-05	0	0.000636685	0.00152418	0	0.00109973	0.00044375	0.000405163	0.000135054	0.000308696	5.78804e-05	0.000135054	0	0.00555652	0.0499122
D3	0.610561	0.359283	0.0133125	0.000482337	0.00791032	0.00113831	0.000135054	0	0	0	0	0	0	0	0	0	0.000192935	0	0.000559511	0	0	0	0	0	0	7.71739e-05	0.000212228	0	0	0	0.00613532
D4	0.577396	0.289595	0.118751	0.000598098	0.0014856	0.000694565	0	0	0	0	0	0	0	0	0	0	0	0.0094731	0.000135054	0	0	0	0	0	0	0	0.000482337	0	0	0	0.00138913
D5	0.257143	0.376763	0.362794	1.92935e-05	0.000347283	0	0	0	0	0	0	0	0	0	0	0	0	0	0	0	0	0	0	3.85869e-05	0	0	0	0	0	0	0.00289402
D6	0.0835214	0.557273	0.218595	0.000405163	0.0627617	1.92935e-05	0.00436032	0	0.00044375	1.92935e-05	0.000810326	0.0014856	9.64674e-05	0	0	0.00605815	1.92935e-05	0	0.00173641	0.000115761	7.71739e-05	0.00248886	0.000289402	0.000559511	0.000192935	0.000270109	0	0	0.000598098	0	0.0578032
D7	0.450618	0.405703	0.140128	0	0.00106114	0.000482337	0.000135054	0	0	0	5.78804e-05	0	0	0	0	0	0	0	0	0	0	0	5.78804e-05	0	0	0	0.000250815	0	0	0	0.00150489
D8	0.725512	0.23866	0.000135054	3.85869e-05	0.00273967	0.000231522	0.000115761	0	0	0.00868206	0.00113831	7.71739e-05	7.71739e-05	0	0	7.71739e-05	0.01065	0	0.000192935	0	0	0	0	0.00343424	7.71739e-05	3.85869e-05	0.000463043	0	0.000231522	0	0.00742799
D9	0.703382	0.129729	9.64674e-05	0.0011769	0.0068106	3.85869e-05	0.000617391	0	0	0	0.00152418	0	0.00135054	0	0.000675272	0	0.000173641	0	0.000482337	0	0	0	0	0.000173641	0	0.00721576	0.000115761	0.00613532	0	0	0.140302
D10	0.772279	0.198318	0.000289402	0.000173641	0.0122899	0.000327989	0.0008875	0	0.000154348	0	0.00277826	0	0.000173641	0	9.64674e-05	0	5.78804e-05	0	0.000694565	0	3.85869e-05	0	0	0.000154348	0	0.000135054	0.000115761	0	0	0	0.0110359
D11	0.562559	0.351334	0.0371399	0.000192935	0.0229785	0.000212228	0.00108043	0	0.000115761	0	0.000964674	0.000270109	0	0	0	7.71739e-05	0	0	0.000115761	0	0	0.000135054	0.000212228	0.00044375	0	0.000617391	0	0.000733152	0	0	0.0208177
D12	0.391793	0.324921	0.26187	0.000154348	0.00339565	1.92935e-05	0.000520924	0	5.78804e-05	0	0.00156277	0	0.00133125	0	0.000289402	0	5.78804e-05	0	0.000231522	3.85869e-05	0	3.85869e-05	0	0	0	0.00100326	0	0	0	0	0.0127144
D13	0.120314	0.858984	0.000270109	5.78804e-05	0.0122899	0.000115761	9.64674e-05	0.000868206	0	0	0.000482337	9.64674e-05	9.64674e-05	0	0	0	0	0	0	0	0	0	0	7.71739e-05	0.000559511	0	0.000192935	0	0	0.000250815	0.00524782
D14	0.576605	0.231657	0.000559511	0.000173641	0.0932646	0.00108043	0.000868206	0.000192935	0	0.000270109	0.000463043	0.0198144	0	0	0	0.00306766	0.00491984	0	0.00393587	0	0	0	0.00756304	0.000829619	0.00673342	0	0.00684918	0.000192935	0.0056144	0.000289402	0.0350562
D15	0.150759	0.329552	0.515136	0	0.000713859	0	0	9.64674e-05	0	0	1.92935e-05	0	0	0	0	0	0	0	0	0	0	0	0	0	0	0	0	1.92935e-05	0	0	0.00370435
D16	0.103297	0.802145	0.0796049	0	0.00426386	0.000135054	0	0	0	5.78804e-05	0	5.78804e-05	0	0	0	0	0.000231522	0	0.000173641	0	0	0	0	0.000347283	0	0	0	0.000308696	0	0	0.00937663

## Sheet: Fungi top10.sample.p
Taxonomy	Basidiomycota	Ascomycota	Olpidiomycota	Chytridiomycota	Mortierellomycota	Rozellomycota	Fungi_phy_Incertae_sedis	Mucoromycota	Others
A1	0.997197	0.00168925	0.000816781	0	0	0	0	0	0.000297011
A3	0.999684	0.000222758	0	0	0	0	0	0	9.2816e-05
A4	0.999777	1.85632e-05	5.56896e-05	0	0	0	0	0	0.000148506
A5	0.999722	0.000148506	1.85632e-05	1.85632e-05	0	0	0	0	9.2816e-05
A6	0.993893	0.00521626	0.000445517	0	0	0	0	0	0.000445517
A7	0.998162	0.00128086	0	0	0	0	0	0	0.000556896
A8	0.996993	0.0010581	0.00116948	0	0	0	3.71264e-05	0	0.000742528
A9	0.992668	0.00289586	0.00226471	0	0.000445517	0.000371264	0.000204195	0	0.00115092
A10	0.991665	0.00204195	0.00098385	0	3.71264e-05	0	0.000167069	0	0.00510488
A11	0.997513	0.000389827	0.000204195	0	3.71264e-05	0	0.000148506	0	0.00170782
A12	0.995304	0.00189345	0.000965287	0	3.71264e-05	0	0.000167069	0	0.00163356
A13	0.991424	0.00556896	0.00222758	0	5.56896e-05	0	3.71264e-05	9.2816e-05	0.000594023
A14	0.996213	0.0019677	0.00165213	0	0	0	0	0	0.000167069
A15	0.983794	0.0120475	0	0	0	0	9.2816e-05	0	0.00406534
A16	0.99987	0.000111379	0	0	0	0	0	0	1.85632e-05
B1	0.997772	0.00211621	0	0	0	0	0	0	0.000111379
B2	0.99974	0.000129942	0	0	0	0	0	0	0.000129942
B3	0.993744	0.00241322	0.00148506	0	0	0	0.000129942	7.42528e-05	0.00215333
B4	0.987915	0.0117319	0	0	0	0	0	0	0.000352701
B5	0.991127	0.00348988	0.000315575	0	0	0	0	0	0.00506776
B6	0.999981	0	0	0	0	0	0	0	1.85632e-05
B7	0.995582	0.00259885	0.000167069	0	0	0	0	0	0.00165213
B8	0.998014	0.00157787	0	0	0	0	0	0	0.000408391
B9	0.99948	0.000482643	3.71264e-05	0	0	0	0	0	0
B10	0.94496	0.0541118	0	0	0	0	0	0	0.00092816
B11	0.998385	0.00131799	0	0	0	0	0	0	0.000297011
B12	0.999443	0.000204195	0	0	0	0	0	0	0.000352701
B13	0.999276	0.000185632	0	0	0	0	0	0	0.000538333
B14	0.937423	0.0625209	0	0	0	0	1.85632e-05	0	3.71264e-05
B15	1	0	0	0	0	0	0	0	0
B16	0.980416	0.0179877	0	0	0	0	0	0	0.00159644
C1	0.999889	9.2816e-05	0	0	0	0	0	0	1.85632e-05
C2	0.933785	0.0657323	0	0	0	0	0	0	0.000482643
C3	0.978634	0.0213663	0	0	0	0	0	0	1.11022e-16
C4	0.979692	0.0178392	0.000352701	0	0.000148506	0	0	0	0.0019677
C5	0.877576	0.119157	0	0.000129942	0	0.000129942	5.56896e-05	1.85632e-05	0.00293299
C6	0.998608	0.00118805	0	0	0	0	0	0	0.000204195
C7	0.996343	0.00339707	0	0	0	0	0	0	0.000259885
C8	0.997828	3.71264e-05	0	0	0	0	0	0	0.00213477
C9	0.997086	0.00250603	0	5.56896e-05	0	0	0	0	0.000352701
C10	0.999907	9.2816e-05	0	0	0	0	0	0	5.55112e-16
C11	0.981734	0.00100241	0	0	0	0	0	0	0.0172638
C12	0.999202	0.000445517	0	0	0	0	0	0	0.000352701
C13	0.991684	0.00790793	9.2816e-05	0	5.56896e-05	0	0	0	0.000259885
C14	0.999907	9.2816e-05	0	0	0	0	0	0	5.55112e-16
C15	0.795879	0.000259885	0	0	0	0	0	0	0.203861
C16	0.998404	0.0014108	1.85632e-05	0	0	0	0	0	0.000167069
C17	0.999963	3.71264e-05	0	0	0	0	0	0	3.33067e-16
D1	0.943141	0.0552255	0	0	0	0	0	0	0.00163356
D2	0.988175	0.00840913	0	0.00128086	7.42528e-05	0	0	0	0.00206052
D3	0.987284	0.0073139	0	0	0	0	0	0	0.00540189
D4	0.997828	0.000241322	0	0	0	0	0	0	0.00193057
D5	0.982198	0.0166698	0	0	0	0	0	0	0.00113236
D6	0.986505	0.00998701	0.000167069	0	0	0	0	0	0.00334138
D7	0.999276	0.00046408	7.42528e-05	0	0	1.85632e-05	0	0	0.000167069
D8	0.999425	0.000334138	0	0	0	0	0	0	0.000241322
D9	0.918637	0.0718582	0	0.000148506	0	0	0	0	0.00935586
D10	0.927863	0.0625023	0	0	0	0	0.000222758	0	0.00941155
D11	0.993336	0.00545758	0	0	0	0	0	0	0.00120661
D12	0.995638	0.00404678	0	0	0	0	0	0	0.000315575
D13	0.996881	0.0030258	0	0	0	0	0	0	9.2816e-05
D14	0.92675	0.0554854	3.71264e-05	7.42528e-05	0	0	0	0	0.0176536
D15	0.999536	0.000259885	0.000204195	0	0	0	0	0	0
D16	0.998255	0.00172638	0	0	0	0	0	0	1.85632e-05
A2	0.996807	0.000594023	0	0	0	0	0	0	0.00259885
	0.983397

## Sheet: Fungi_top30.sample.g
Taxonomy	Malassezia	Malasseziales_gen_Incertae_sedis	Fusarium	Cladosporium	Capnodiales_gen_Incertae_sedis	Didymella	Alternaria	Hortaea	Pectenia	Aspergillus	Strelitziana	Sarcinomyces	Aureobasidium	Neopyrenochaeta	Spissiomyces	Didymocyrtis	Candida	Wallemia	Nigrospora	Meyerozyma	Rhodotorula	Sterigmatomyces	Penicillium	Toxicocladosporium	Vishniacozyma	Phaeosphaeria	Cyphellophora	Tausonia	Periconia	Discosia	Others
A1	0.996993	0	0	3.71264e-05	0	0	0	0	0	3.71264e-05	0	0	0	0	0	0	0	0	0.000129942	0	0	0	0	0	0	0	0	0	0	0	0.00280304
A3	0.753889	0.245795	0	3.71264e-05	0	0	0	0	0	0	0	0	0	0	0	0	0	0	0	0	0	0	0	0	0	0	0	0	0	9.2816e-05	0.000185632
A4	0.766252	0.233525	0	0	0	0	0	0	0	0	0	0	1.85632e-05	0	0	0	0	0	0	0	0	0	0	0	0	0	0	0	0	0	0.000204195
A5	0.470967	0.528699	1.85632e-05	1.85632e-05	0	0	0	0	0	0	0	0	0	0	0	0	0	0	0	0	0	0	0	0	0	0	0	0	0	0	0.000297011
A6	0.993262	0	0	0.000965287	0	0	0	0	0	7.42528e-05	0	0	0	0	0	0	7.42528e-05	7.42528e-05	0.000167069	0	5.56896e-05	0	0	0	0.000111379	0	0.00365695	0	0	0	0.00155931
A7	0.589048	0.408947	0	5.56896e-05	0	0	0.000241322	0	0	0.000297011	0	0	0	0	0	0	0	0	0	0.000129942	0	0	0	0	0	0	0	0	0	0	0.00128086
A8	0.995749	0.000779655	0	0.000334138	0	0	0	0	0	0	3.71264e-05	0	0	0	0	0	0	0	0	0	0	0	0	0	0.000204195	0	0	0	0	0	0.00289586
A9	0.992166	5.56896e-05	0	0.000705402	0	0	0.000482643	0	0	0.000222758	0	0	5.56896e-05	0	0	0	0	0	0	5.56896e-05	1.85632e-05	0	0	0	0	0	0	0	0	0	0.00623724
A10	0.966605	0.0235381	0.000111379	0	0	0	0	0	0	0	1.85632e-05	0	0	0	0	0	0	0	0	0	0.000129942	0	0	0	0	0	0	0	0	5.56896e-05	0.00954149
A11	0.779636	0.217616	0	7.42528e-05	0	0	0	0	0	0	0	0	0	0	0	0	0	0	0	0	0	0	0	0	0.000111379	0	0	0	0	0	0.00256172
A12	0.994895	5.56896e-05	0.000148506	0.000426954	0	0	7.42528e-05	0	0	0.000371264	0	0	1.85632e-05	0	3.71264e-05	0	0	3.71264e-05	0.000111379	0	0	0	0	0	0.000111379	3.71264e-05	0	0	0	1.85632e-05	0.00365695
A13	0.98979	0	0.000426954	0.000426954	5.56896e-05	0	0	0	0	1.85632e-05	0	0	0	0	0	0	0.000482643	0	0	0	0	0	0	0	0.000909597	5.56896e-05	0	0	0	0.000389827	0.00744385
A14	0.98088	0.0150362	3.71264e-05	0.000315575	0	0	0	0	0	0.000315575	0	0	0	0	0	0	0	0	0	0	0	0	0	0	0	0	0	0	0	0	0.00341563
A15	0.935437	0.0406163	0	0.00376833	0	0	0	0	0	0.000946724	0	0	0	0	0	0	0	0	0	0	0	0	0.000204195	0	0.00384258	0	0	0	0	0.00315575	0.012029
A16	0.999833	3.71264e-05	0	7.42528e-05	0	0	0	0	0	0	0	0	0	0	0	0	0	0	3.71264e-05	0	0	0	0	0	0	0	0	0	0	0	1.85632e-05
B1	0.997383	0	0	0.000631149	0	0	0	0	0	0.000352701	0	0	0.000891034	0	0	0	0	0	0	0	0.000185632	7.42528e-05	0	0	0	0	0	0	3.71264e-05	0	0.000445517
B2	0.99974	0	0	3.71264e-05	0	0	0	0	0	0	0	0	0	0	0	0	0	0	0	0	0	0	0	0	0	0	0	0	0	0	0.000222758
B3	0.992705	0.00103954	1.85632e-05	0.00120661	0	0	0	0	0	0	0	0	0	0	0	0	0	0	0	7.42528e-05	0	0	0	0	0	0	0	0	0	0	0.00495638
B4	0.509801	0.475645	0	0.000705402	0	0	0	0	0	0	0	0	0.0109523	0	0	0	0	0	0	0	0.000946724	0	0	0	1.85632e-05	0	0	0	0	0	0.00193057
B5	0.990217	0.000872471	0	0.00092816	0.000204195	0	0	0	0	0	0	9.2816e-05	0	0	0	0	0	0	0	0	0	0	0	0	0	0	0	0	0	0	0.00768517
B6	0.99948	0.000501207	0	0	0	0	0	0	0	0	0	0	0	0	0	0	0	0	0	0	0	0	0	0	0	0	0	0	0	0	1.85632e-05
B7	0.995582	0	0	0.000185632	0	0	0	0	0	0	0	0	0	0	0	0	0	0	0.000891034	0	0	0	0	0	0	0	0	0	0	0	0.00334138
B8	0.994821	0.00313718	0	0.000204195	0	0	0	0	0	0.000761092	0	0	0	0	0	0	7.42528e-05	0	0.000129942	0	0	0	0	0	0	0	0	0	0	0	0.000872471
B9	0.99948	0	0	0.000167069	0	0	0	0	0	0	0	0	0	0	0	0	0	0	0.000185632	0	0	0	0	0	0	0	0	0	0	0	0.000167069
B10	0.935975	0	0.000556896	0.0091331	0	0	0.000631149	7.42528e-05	0	0.000259885	0.0141266	0	0	0.00868758	0	0.0069612	0	0	0	0.00510488	0.000315575	0	0.00046408	0	0.000167069	0.00367552	0	0	0	0	0.0138667
B11	0.996751	0.00133655	0	0.000167069	0	0	0	0	0	0.000259885	0	0	1.85632e-05	0	0	0	0	0	9.2816e-05	0	0	0	0	0	0.000204195	0	0	0	0	0	0.00116948
B12	0.999387	0	0	0.000185632	0	0	0	0	0	0	0	0	0	0	0	0	0	0	0	1.85632e-05	0	0	0	0	0	0	0	0	0	0	0.000408391
B13	0.998923	0.000352701	0	0.000111379	0	0	0	0	0	0	0	0	0	0	0	0	0	0	0	0	0	0	0	0	0	0	0	0	0	0	0.000612586
B14	0.935623	0.000315575	0.0489883	0.00051977	0	0	0.000204195	0.00462224	0	0.00046408	0	0	0	0	0	0	0.00649712	0.000111379	0.000129942	0	0.000185632	0	1.85632e-05	0	0.000148506	0	0	0	0	0	0.0021719
B15	0.63295	0.36705	0	0	0	0	0	0	0	0	0	0	0	0	0	0	0	0	0	0	0	0	0	0	0	0	0	0	0	0	0
B16	0.968387	0.0112679	0	0.00051977	0	0	0.000167069	0	0	0.000853908	0	0	0	0.000129942	0.00844626	0	9.2816e-05	0	0	0	0	0	0.000148506	0	0	0	0	0	0	0	0.00998701
C1	0.999684	0.000111379	0	3.71264e-05	0	0	0	0	0	5.56896e-05	0	0	0	0	0	0	0	0	0	0	0	0	0	0	3.71264e-05	0	0	0	0	0	7.42528e-05
C2	0.885521	0.000185632	0	0.0290885	0	0	0.00493781	0.0101355	0	0.00978281	0	0	0.000334138	0	0	0	0.00051977	0.000649712	0.00137368	0.000167069	0.000816781	0.00103954	0.000816781	0.00180063	0	0	0	0	0	0	0.0528309
C3	0.978541	0	5.56896e-05	0.00146649	0	0	0.000204195	0.018062	0	0.000222758	0	0	3.71264e-05	0	0	0	0	0	0	0	0	0	0	0.000705402	0	0	0	0	1.85632e-05	0	0.000686839
C4	0.959477	0.0144793	0.000371264	0.00438092	0	0	0.00402822	7.42528e-05	0	0.000556896	0.000111379	5.56896e-05	0	0	0	0	0	5.56896e-05	0.00046408	0	0.00477074	0	0.000241322	0	0	0	7.42528e-05	0	0.000167069	0	0.0106924
C5	0.83811	0.0152033	0.00224615	0.0478374	1.85632e-05	0	9.2816e-05	0.000779655	0	0.0154632	0	0.0130871	0.0014108	0	0	0	0.000742528	0.00501207	0.00616298	0.000204195	0.000426954	0.00473362	0.000742528	0.00432523	9.2816e-05	0.000204195	0.000334138	0.00354557	0.00350845	0	0.0357156
C6	0.674735	0.323798	0	0.000612586	0	9.2816e-05	0.000111379	3.71264e-05	0	1.85632e-05	0	0	0	0	0	0	3.71264e-05	0	0	0	0	0	5.56896e-05	0	0	0	0	0	0	0	0.000501207
C7	0.994375	0.000426954	0	0.00109523	0	0	0.000204195	0	0	0.000575459	0	0	0	0	0	0	0	3.71264e-05	0	0	0.000111379	0.000315575	1.85632e-05	0.000315575	0	0	0	0	0.000167069	0	0.00235753
C8	0.610581	0.387247	0	1.85632e-05	0	0	0	0	0	1.85632e-05	0	0	0	0	0	0	0	0	0	0	0	0	0	0	0	0	0	0	0	0	0.00213477
C9	0.996232	0.000556896	0	0.00046408	0	0	1.85632e-05	0	0	1.85632e-05	0	3.71264e-05	5.56896e-05	0	0	0	0	9.2816e-05	0	0	3.71264e-05	0	0.00137368	0	0	0	0	0	0	7.42528e-05	0.00103954
C10	0.582551	0.417357	0	9.2816e-05	0	0	0	0	0	0	0	0	0	0	0	0	0	0	0	0	0	0	0	0	0	0	0	0	0	0	4.44089e-16
C11	0.53256	0.449174	0	0.000222758	0	0	7.42528e-05	0	0	3.71264e-05	0	1.85632e-05	0	0	0	0	0	0	7.42528e-05	0	0	0	3.71264e-05	0.000129942	0	0	0	0	0	0	0.0176722
C12	0.998979	0.000204195	0	3.71264e-05	0	0	0.000167069	0	0	5.56896e-05	0	0	0	0	0	0	0	0	0.000148506	0	0	0	1.85632e-05	0	0	0	0	0	0	0	0.000389827
C13	0.987952	0.000278448	0.000538333	0.00233896	0	0	0.00150362	0	0	0.000408391	0	0.000129942	3.71264e-05	0	0	0	0	0.000167069	7.42528e-05	0	0.000129942	0	0.000129942	5.56896e-05	0	0	0	0	0	0	0.0062558
C14	0.852144	0.147763	0	0	0	0	0	0	0	3.71264e-05	0	0	0	0	0	0	0	0	1.85632e-05	0	0	0	1.85632e-05	0	0	0	0	0	0	0	1.85632e-05
C15	0.795805	7.42528e-05	0	3.71264e-05	0	0	0	0	0	7.42528e-05	0	1.85632e-05	0	0	0	0	0	0	0	0	0	0	0.000111379	0	0	0	0	0	0	0	0.20388
C16	0.998088	0.000111379	0	0.000148506	0	0	0	0	0	0	0	7.42528e-05	0	0	0	0	0	0	0	0	0	0	0	0	0	0	0	0	1.85632e-05	0	0.00155931
C17	0.361389	0.638574	0	0	0	0	3.71264e-05	0	0	0	0	0	0	0	0	0	0	0	0	0	0	0	0	0	0	0	0	0	0	0	0
D1	0.896937	0.0382773	0.000501207	0.0143122	0	0.000946724	0.0182848	0.000426954	0	0.00300724	7.42528e-05	0.000259885	0.00113236	0	0.00107667	0	0.000222758	0.000352701	0.0035827	0	0.000297011	0.000371264	0.000204195	0	0	0.000167069	0	0.000426954	0.00115092	0	0.0179877
D2	0.949954	0.0376647	0	0.00259885	0	0	0.00271023	0	0	0.000148506	0	0	0	0	0	0	3.71264e-05	5.56896e-05	0.000129942	0	5.56896e-05	0	0.000129942	0	0	1.85632e-05	1.85632e-05	0	0.000148506	0	0.00633005
D3	0.981789	0.00530908	0.000129942	0.000965287	9.2816e-05	0	0.00131799	5.56896e-05	0	0.000705402	0	0	0	0	0	0	5.56896e-05	1.85632e-05	0	0	9.2816e-05	0	0	0	0	0	0	0	0	0	0.00946724
D4	0.642194	0.355485	0	3.71264e-05	0	0	0	0	0	7.42528e-05	0	0	0	0	0	0	0	0	0	0	0.000148506	0	0	0	0	0	0	0	0	0	0.00206052
D5	0.9814	0.000111379	1.85632e-05	0.00228327	0	0	0.00330425	0	0	0.00103954	0	0	0	0	0	0	0	0.000185632	0	0	0	0	5.56896e-05	0	5.56896e-05	0	0.000241322	0	0.000723965	0	0.010581
D6	0.29135	0.688472	3.71264e-05	0.000445517	0	1.85632e-05	0.00100241	1.85632e-05	0	0.00213477	0	0	1.85632e-05	0	0	0	3.71264e-05	0.00647856	1.85632e-05	0	0	0.000167069	0.00469649	0	0	0	0	0	0	0	0.00510488
D7	0.990236	0.00865045	0	0	0	0	3.71264e-05	0	0	1.85632e-05	0	0	5.56896e-05	0	0	0	0	0	0	0	0	0	0.000129942	0	0	0	0	0	0	0	0.000872471
D8	0.999072	0.000278448	0	0.000185632	0	0	0	0	0	9.2816e-05	0	3.71264e-05	0	0	0	0	0	3.71264e-05	0	0	0	0	0	0	0	0	0	0	0	0	0.000297011
D9	0.916596	0.000222758	0.000501207	0.0195656	0.0215333	0	0.000612586	0	0.01602	0.00295155	3.71264e-05	0.000612586	0.000111379	0	0	0	0	0	0.000185632	0	0	0	0	0	0.00152218	0	3.71264e-05	0	9.2816e-05	0	0.0193986
D10	0.84858	0.0736402	0.0135697	0.0176907	0	0	0.00328569	0.000241322	0.000705402	0.00837201	5.56896e-05	0.00382402	0.000705402	0	0	0	7.42528e-05	0.000241322	0.00113236	0	0.000185632	3.71264e-05	0.000668275	0.000426954	3.71264e-05	0	0	0	0.00103954	0	0.0254873
D11	0.976852	0.0164284	0	0.000222758	0	1.85632e-05	3.71264e-05	0	0	0.00384258	0	0	3.71264e-05	0	0	0	0	0	7.42528e-05	0	0	0	0	3.71264e-05	0	0	0	0	0	0	0.00245034
D12	0.995304	0.000129942	0	0.00163356	0	0	0.000891034	0	0	0	3.71264e-05	7.42528e-05	1.85632e-05	0	0	0	0	7.42528e-05	0	1.85632e-05	0	1.85632e-05	5.56896e-05	0	0	1.85632e-05	0	0	0	0	0.00172638
D13	0.99612	0.000445517	0	0.00157787	0	0	0	0	0	5.56896e-05	0	0	0	0	0	0	1.85632e-05	7.42528e-05	0.000167069	0	0	1.85632e-05	0	0	3.71264e-05	0	0	0	0	0	0.00148506
D14	0.912252	0.0129571	0.000371264	0.0112307	3.71264e-05	0.0214219	0.00458511	0.000779655	0	0.00779655	0	0.000389827	0	0	0	0	0.000111379	0.000315575	0.00046408	0	0.000185632	0.00051977	0.000371264	0.00118805	9.2816e-05	0	0	0	0.00129942	0	0.023631
D15	0.99948	5.56896e-05	0	0	0	0	0.000111379	0	0	5.56896e-05	0	0	0	0	0	0	0	0	0	0	0	0	0	0	0	0	0	0	0	0	0.000297011
D16	0.998088	0.000167069	0	0	5.56896e-05	0	0	0	0	0	0	5.56896e-05	0	0	0	0	0	0	0	0	0	0	0	0	0	0	0	0	0	0	0.00163356
A2	0.893856	0.102952	0	0	0	0	3.71264e-05	0	0	1.85632e-05	0	0	0	0	0	0	0	0	0	9.2816e-05	0	0	0	0	0	0	0	0	0	0	0.00304437

## Sheet: alpha_index bacteria
Sample_Name	chao1	dominance	goods_coverage	observed_otus	pielou_e	shannon	simpson
A10	57.1111	0.811289	0.999908	56	0.118979	0.690953	0.188711
A2	76.6667	0.362936	0.999908	75	0.300227	1.87006	0.637064
A4	20	0.484791	0.999982	20	0.350601	1.51527	0.515209
A7	23	0.44288	0.999926	21	0.358123	1.57299	0.55712
A9	29	0.419519	1	29	0.300873	1.46163	0.580481
B1	53	0.315269	0.999815	48	0.380321	2.12408	0.684731
B15	41.5	0.409571	0.999889	39	0.303087	1.60194	0.590429
B16	161.474	0.271842	0.999778	158	0.331552	2.42158	0.728158
B6	66.625	0.352833	0.999908	66	0.286999	1.73473	0.647167
B7	48.625	0.573093	0.999871	46	0.233987	1.29244	0.426907
C10	91.2727	0.381384	0.999538	64	0.276533	1.6592	0.618616
C14	77.5	0.440355	0.999815	73	0.255344	1.58054	0.559645
C17	39.375	0.479487	0.999945	39	0.289689	1.53112	0.520513
C6	93	0.369038	0.999852	91	0.290118	1.88803	0.630962
C7	76.1111	0.533195	0.999852	73	0.226159	1.39988	0.466805
D1	119.667	0.295905	0.999889	118	0.314758	2.16637	0.704095
D11	185.65	0.276272	0.999575	173	0.336699	2.50323	0.723728
D15	30	0.371256	0.999908	25	0.385984	1.79245	0.628744
D16	81.6667	0.573207	0.999889	80	0.228513	1.44464	0.426793
D4	28	0.329179	0.999982	28	0.423182	2.03439	0.670821
D8	108.25	0.471094	0.999723	103	0.250671	1.67611	0.528906

## Sheet: alpha_index fungi
Sample_Name	chao1	dominance	goods_coverage	observed_otus	pielou_e	shannon	simpson
A10	57	0.846199	0.999947	56	0.107289	0.623065	0.153801
A2	21	0.65059	0.999929	15	0.273997	1.07048	0.34941
A4	10	0.581195	0.999982	10	0.317124	1.05346	0.418805
A7	22	0.440083	0.999982	22	0.315931	1.40887	0.559917
A9	49	0.471844	0.999911	44	0.271327	1.48129	0.528156
B1	25	0.95494	1	25	0.0453936	0.210801	0.04506
B15	5	0.352895	1	5	0.664053	1.54188	0.647105
B16	51	0.427167	0.999947	50	0.284731	1.60698	0.572833
B6	6	0.987824	0.999982	6	0.0247327	0.0639332	0.0121759
B7	20	0.549554	1	20	0.245479	1.06094	0.450446
C10	9	0.324073	0.999982	9	0.56092	1.77808	0.675927
C14	12	0.420731	0.999982	12	0.462612	1.65845	0.579269
C17	5	0.516522	0.999982	5	0.460169	1.06848	0.483478
C6	25	0.380365	0.999911	20	0.34941	1.51012	0.619635
C7	30.8571	0.975882	0.999929	30	0.0262768	0.128938	0.0241181
D1	138.25	0.731219	0.999911	137	0.171601	1.21803	0.268781
D11	43.2	0.939733	0.999876	39	0.0521431	0.275597	0.0602673
D15	8	0.99723	1	8	0.00592022	0.0177607	0.00276964
D16	23	0.576155	0.999982	23	0.253272	1.14569	0.423845
D4	10	0.431371	0.999982	10	0.412388	1.36992	0.568629
D8	23	0.856109	0.999929	21	0.109308	0.480117	0.143891

[truncated: 1 more sheets: DIAMOND KEGG.level1]
